# Supplementary material for: Inducible T-Cell Costimulator Ligand Plays a Dual Role in Melanoma Metastasis upon Binding to Osteopontin or Inducible T-Cell Costimulator
Source: MDPI journal article supplement (doi:10.3390/biomedicines10010051), 2021-12-27
Supplement: s1 [file s1]

A.

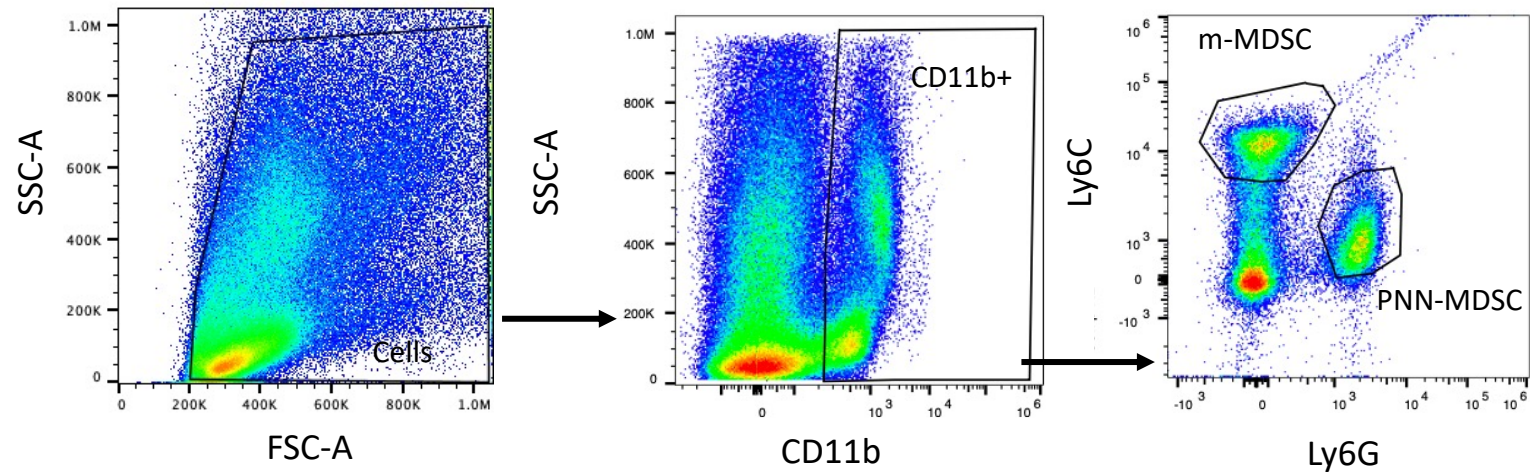

B. FMO Ly6G

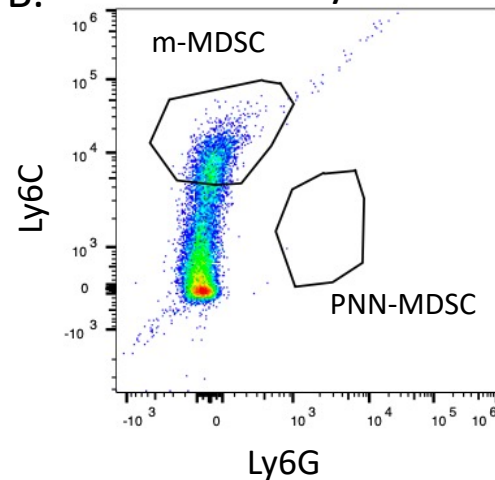

C. FMO Ly6C

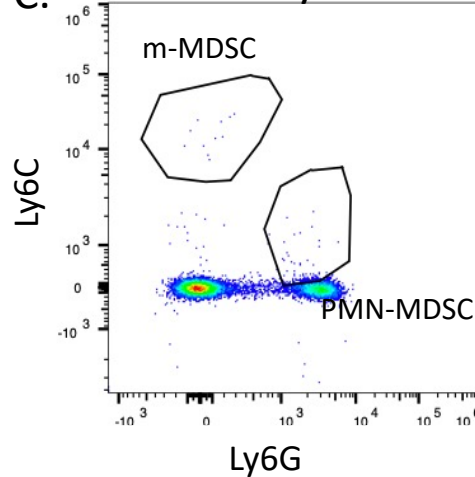

**Supplementary Figure S1.** Gating strategies defining M-MDSC in lungs. After the identification of the cells using the morphological parameters (FSC-A vs SSC-A), MDSC were identified as CD11b<sup>+</sup> cells and M-MDSC were defined as Ly6C-positive and Ly6G-negative cells. B) Fluorescence minus one (FMO) of Ly6G and C) FMO of Ly6C.

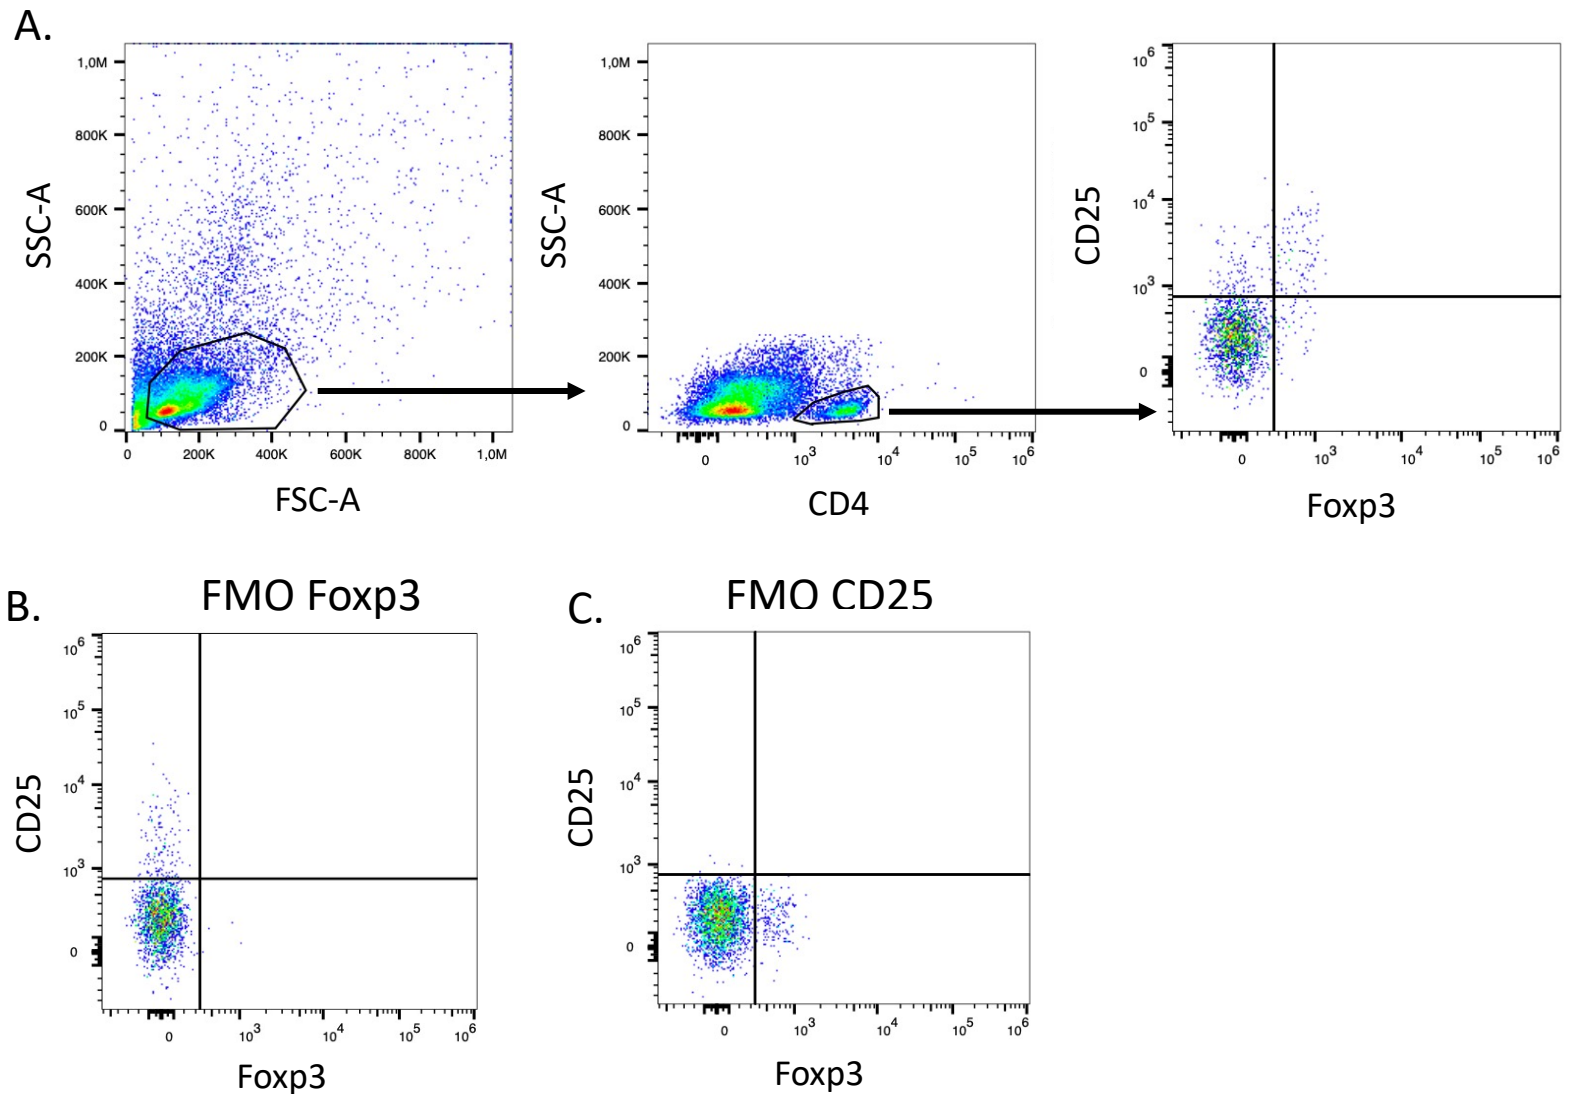

**Supplementary Figure S2.** A) Gating strategies defining regulatory T cells (Treg) in lungs. Cells were gated on CD4<sup>+</sup> T cells after morphological discrimination (FSC-A vs. SSC-A), and Tregs are shown as CD25<sup>+</sup>Foxp3<sup>+</sup> cells, B) fluorescence minus one (FMO) of Foxp3 and C) FMO of CD25 markers.

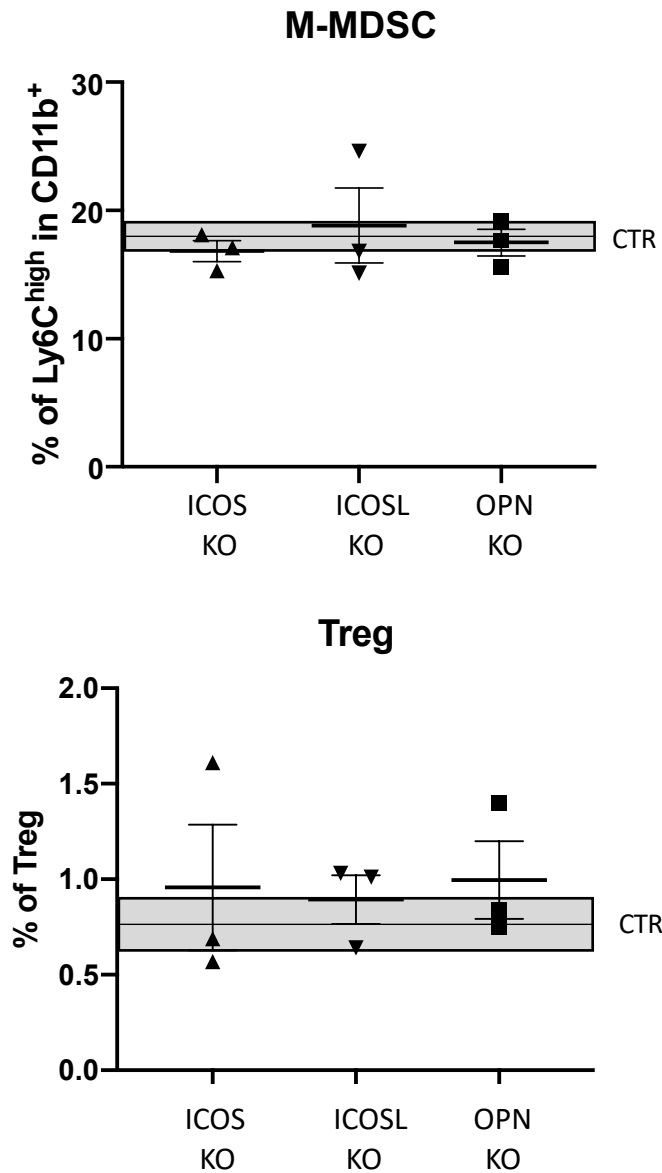

**Supplementary Figure S3.** Percentages of m-MDSC and Tregs in lungs of tumor free bearing mice.
